RESEARCH ARTICLE

# The ultrastructural characteristics of porcine hepatocytes donated after cardiac death and preserved with warm machine perfusion

Hiroki Bochimoto<sup>1</sup>, Naoto Matsuno<sup>2\*</sup>, Yo Ishihara<sup>3</sup>, Tatsuya Shonaka<sup>2</sup>, Daisuke Koga<sup>3</sup>, Yoshiki Hira<sup>4</sup>, Yuji Nishikawa<sup>5</sup>, Hiroyuki Furukawa<sup>2</sup>, Tsuyoshi Watanabe<sup>3</sup>

**1** Health Care Administration Center, Obihiro University of Agriculture and Veterinary Medicine, Obihiro, Hokkaido, Japan, **2** Department of Surgery, Asahikawa Medical University, Asahikawa, Hokkaido, Japan, **3** Department of Microscopic Anatomy and Cell Biology, Asahikawa Medical University, Asahikawa, Hokkaido, Japan, **4** Area of Functional Anatomy, Department of Nursing, Asahikawa Medical University, Asahikawa, Hokkaido, Japan, **5** Department of Pathology, Asahikawa Medical University, Asahikawa, Hokkaido, Japan

\* [mtn@asahikawa-med.ac.jp](mailto:mtn@asahikawa-med.ac.jp)

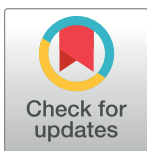

**OPEN ACCESS**

**Citation:** Bochimoto H, Matsuno N, Ishihara Y, Shonaka T, Koga D, Hira Y, et al. (2017) The ultrastructural characteristics of porcine hepatocytes donated after cardiac death and preserved with warm machine perfusion preservation. *PLoS ONE* 12(10): e0186352. <https://doi.org/10.1371/journal.pone.0186352>

**Editor:** Edward J. Lesnfsky, Virginia Commonwealth University, UNITED STATES

**Received:** November 25, 2016

**Accepted:** October 1, 2017

**Published:** October 12, 2017

**Copyright:** © 2017 Bochimoto et al. This is an open access article distributed under the terms of the [Creative Commons Attribution License](https://creativecommons.org/licenses/by/4.0/), which permits unrestricted use, distribution, and reproduction in any medium, provided the original author and source are credited.

**Data Availability Statement:** All relevant data are within the paper and its Supporting Information files.

**Funding:** This work was supported by the Japan Society for the Promotion of Science Award no. 15K18951 to HB (<https://www.jsps.go.jp/english/>) and a Grant-in-Aid for Innovative Research in Life Science from Asahikawa Medical University to NM. The funders had no role in study design, data

## Abstract

The effects of warm machine perfusion preservation of liver grafts donated after cardiac death on the intracellular three-dimensional ultrastructure of the organelles in hepatocytes remain unclear. Here we analyzed comparatively the ultrastructure of the endomembrane systems in porcine hepatocytes under warm ischemia and successive hypothermic and midthermic machine perfusion preservation, a type of the warm machine perfusion. Porcine liver grafts which had a warm ischemia time of 60 minutes were perfused for 4 hours with modified University of Wisconsin gluconate solution. Group A grafts were preserved with hypothermic machine perfusion preservation at 8°C constantly for 4 hours. Group B grafts were preserved with rewarming up to 22°C by warm machine perfusion preservation for 4 hours. An analysis of hepatocytes after 60 minutes of warm ischemia by scanning electron microscope revealed the appearance of abnormal vacuoles and invagination of mitochondria. In the hepatocytes preserved by subsequent hypothermic machine perfusion preservation, strongly swollen mitochondria were observed. In contrast, the warm machine perfusion preservation could preserve the functional appearance of mitochondria in hepatocytes. Furthermore, abundant vacuoles and membranous structures sequestering cellular organelles like autophagic vacuoles were frequently observed in hepatocytes after warm machine perfusion preservation. In conclusion, the ultrastructure of the endomembrane systems in the hepatocytes of liver grafts changed in accordance with the temperature conditions of machine perfusion preservation. In addition, temperature condition of the machine perfusion preservation may also affect the condition of the hepatic graft attributed to autophagy systems, and consequently alleviate the damage of the hepatocytes.

collection and analysis, decision to publish, or preparation of the manuscript.

**Competing interests:** The authors have declared that no competing interests exist.

## Introduction

The shortage of brain-dead donor liver grafts is a serious problem worldwide. One way of expanding the donor organ pool is by using grafts donated after cardiac death (DCD). However, the use of DCD liver grafts incurs a higher risk of primary nonfunction or ischemia-reperfusion injury. The superiority of machine perfusion preservation (MP) to simple cold storage was recently reported in clinical kidney preservation [1,2]. Similarly, in the field of liver transplantation, strategies as MP with oxygen and nutrition-containing solution have the potential to improve the outcome of liver transplantation with marginal grafts by reducing preservation injury and improving graft assessment [3,4]. MP of DCD liver grafts are roughly categorized into two groups: cold MP and warm MP (WMP) [3,5,6]. Many studies have shown that the cold MP, named hypothermic MP (HMP) first introduced in accordance with preceding MP of kidney [7], improved graft function and attenuated classical biochemical markers of liver preservation injury compared to simple cold storage [8–16]. In addition, WMP had emerged as a novel strategy, which maintain liver grafts at a more physiologic temperature compared to HMP to avoid cold ischemic injury and offers the opportunity to assess and possibly repair a metabolically active liver graft [3,6,17,18]. WMP, including 3 subcategories by temperature range [19]: midthermic MP (MMP, 13–24C), subnormothermic MP (SMP, 25–34C) and normothermic MP (NMP, 35–38C), have already proven advantageous in reducing markers of biliary injury during preservation and restoring normal biliary physiology [20]. Furthermore, WMP of DCD liver grafts have demonstrated the good result for the graft function and transplantation in rat, porcine and human [20–37]. Matsuno et al. directly showed that the AST and LDH levels in the effluent were lower in MMP or SMP (22–25C) with gradual rewarming as a type of WMP compared with HMP after temporal hypothermia subsequent warm ischemia [38–40]. Matsuno et al. subsequently described that the utility of MMP or SMP with gradual rewarming are more relevant clinically than HMP under the reality situation of clinical organ retrieval requiring a period of cold preservation due to transport between institutions [39,41].

However, the effects of each type of MP on the intracellular ultrastructure of organelles, including the mitochondria in hepatocytes, differ, and few studies have examined these effects in detail. A number of reports have described the ultrastructural changes in hepatocytes under conditions of warm ischemia or various types of MP using a transmission electron microscope (TEM) [42–45]. However, three-dimensional (3D) intracellular ultrastructure, particularly the shape of the mitochondrial cristae, has been unclear, partly due to the limitations inherent in the two-dimensional images obtained by a TEM [46,47]. This dimensional limitation may be resolved by using osmium maceration, in which the specimens are immersed in a diluted osmium tetroxide solution to remove the cytoplasmic matrix [48]. Osmium maceration enables the clarification of the 3D ultrastructure of organelles composed of lipid components.

We recently found osmium maceration useful for determining the 3D ultrastructure in porcine hepatocytes [49]. Subsequently, in this study, we comparatively investigated the changes in the ultrastructure of the endomembranous systems, including the mitochondria, endoplasmic reticulum, and autophagosomes in porcine hepatocytes under warm ischemia and successive HMP or WMP. Based on this, we also discussed the putative theories of WMP as more optimal conditions of preservation of DCD liver grafts.

## Materials and methods

### Antibodies

Mouse monoclonal anti-cytochrome C antibodies were purchased from Promega Corporation (Madison, WI, USA; product code G7421). Rabbit polyclonal anti-LC3 antibodies were purchased

from Medical and Biological Laboratories (Nagoya, Japan; product code PM036). Secondary antibodies conjugated with fluorescent dyes (Alexa Fluor 488- and 594-conjugated donkey polyclonal anti-rabbit- and anti-mouse-IgGs) were purchased from Invitrogen (Carlsbad, CA, USA) for observation with a confocal laser microscope.

### Animals

Domestic female cross-bred Large-Yorkshire, Landrace, and Duroc pigs (approximately 25 kg, 2 to 3 months old) were purchased from Daisetsusanrokusya Co., Ltd. All animal work was conducted according to the Guide for the Care and Use of Laboratory Animals at Asahikawa Medical University. All animal studies and procedures were approved by Asahikawa Medical University Animal Research Committee (permit no. 14172).

### Perfusion preservation machine

Porcine livers were perfused with a machine perfusion system (Fig 1) described previously [39]. The system consists of 2 separate circulating perfusion circuits for the portal vein (PV) and hepatic artery (HA), each has a roller pump, a flow meter and a pressure sensor, allowing nonpulsatile and pulsatile flow, respectively. An oxygenator was installed in the HA circuit. An oxygenator was installed in the HA circuit.

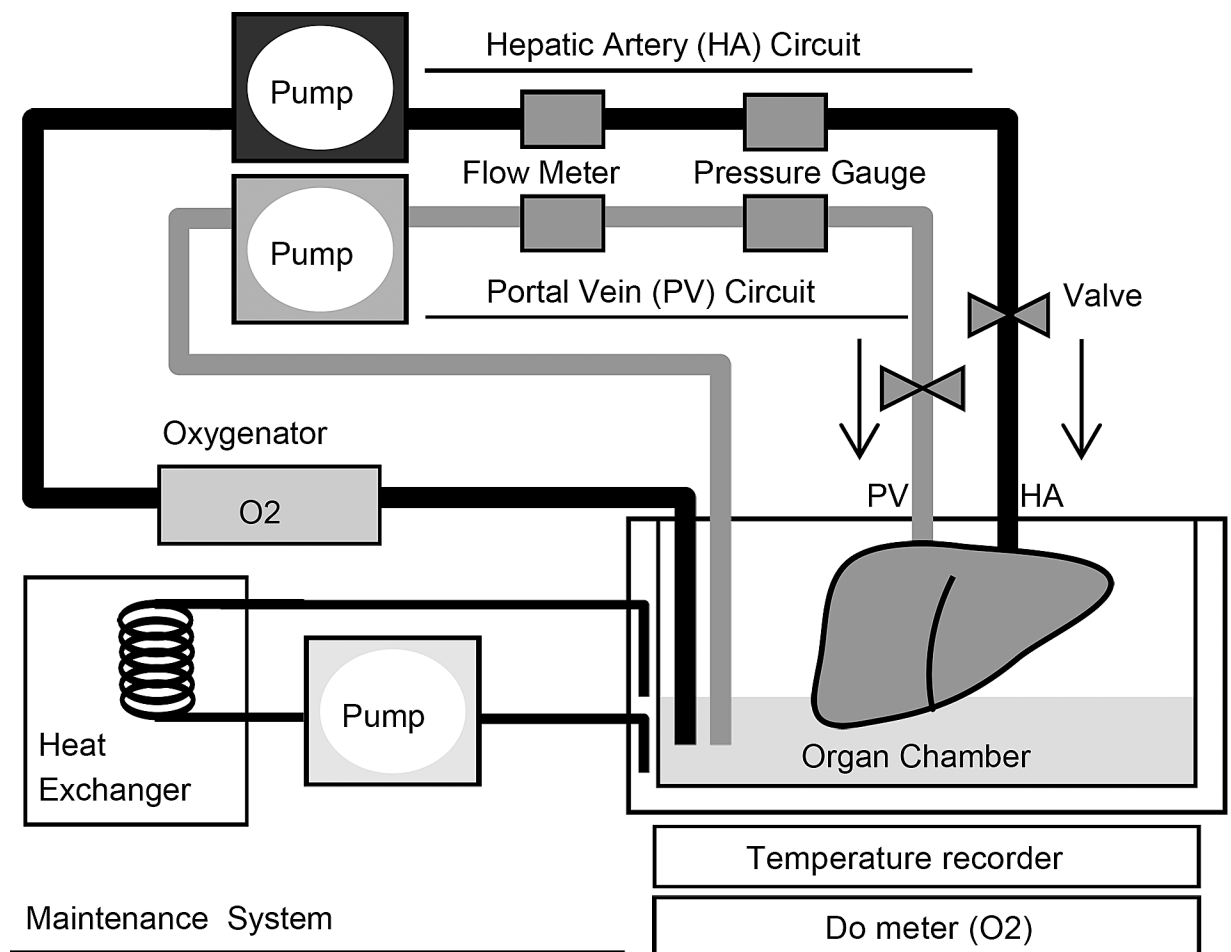

**Fig 1. Schematic representation of the continuous machine perfusion system.**

<https://doi.org/10.1371/journal.pone.0186352.g001>

Both circuits were connected via plastic connectors to the hepatic vessels. Waterproof thermocouples installed in this system measured the solution and the organ temperatures. Furthermore, a dissolved oxygen (DO) meter was installed in this system to measure the DO concentration of solution. A computer records data and controls flow conditions and temperatures of the preservation solution. The temperature in the organ chamber was controlled by a heat exchanger and ice-cold water. As described previously [38–41], the flow rate was controlled as 0.22 and 0.06 mL/min per gram for the PV and HA, respectively.

## Preparation and preservation of the DCD liver

Six pigs weighing approximately 25 kg each were used as donors. In the present research, under inhalation anesthesia with isoflurane (Forane, Abbott, Japan), the pigs were laparotomized and the tissue samples of liver were biopsied from at least three distinct regions as control. Then, cardiac arrest was induced by intravenous injection of potassium chloride described previously [38][49], and removal of ventilation. The induction of cardiac arrest set as the starting point of warm ischemia. During warm ischemia, we performed the peeling around the blood vessels including portal vein and hepatic artery to connect with organ flush lines. Sixty minute after warm ischemia, the tissue samples of liver biopsied from at least three distinct regions, and the liver was procured to initially flushed with Euro-Collins solution via portal vein and hepatic artery at 8°C as a back table operation. Immediately, the organ flush lines connected to the perfusion preservation machine and the livers were perfused via both the hepatic artery and the portal vein in a closed circuit. Livers were perfused for 4 h with modified University of Wisconsin gluconate solution. The temperature conditions of the machine perfusion were divided to two groups, A and B. In Group A (n = 3), grafts were perfused at 8°C constantly as HMP. In Group B (n = 3), grafts were gradually rewarmed from 8 to 22°C during perfusion as MMP. These experimental conditions of groups A and B correspond to the groups of “2” (HMP after warm ischemia) and “3” (MP with rewarming after warm ischemia) in the previous study [38], respectively. Four hours after each MP, the tissue samples of liver were collected from at least three distinct regions of well-perfused area of a liver graft. All the samples were immediately treated with each fixative as described below for the analysis.

Hepatocellular damages of the preserved livers were evaluated by aspartate aminotransferase (AST), lactate dehydrogenase (LDH) levels in perfusate as described previously [38]. Perfusate was collected from the suprahepatic vena cava at 4 hours after reperfusion of each MP.

## Transmission electron microscopy

For observation by TEM, the samples biopsied from the liver of the experimental animals were cut into small pieces and immediately transferred into a fixative mixture of 2% glutaraldehyde /2% paraformaldehyde (PFA) in 0.1 M phosphate buffer (PB, pH adjusted to 7.4) for 2 h at 4°C. After washing thoroughly with 0.1 M PB containing 7.5% sucrose, the samples were further fixed with 1% osmium tetroxide (OsO<sub>4</sub>) in 0.1 M PB for 2 h at 4°C. The samples were then washed thoroughly with 0.1 M PB containing 7.5% sucrose, dehydrated in ascending concentrations of ethanol (50%, 70%, 95%, and 100%), transferred into propylene oxide, infiltrated, and embedded in epoxy resin (Epon 812). The ultrathin sections from the samples embedded in Epon 812 were then contrasted with saturated aqueous solutions of uranyl acetate and lead citrate, and examined using a TEM (H-7650; Hitachi High Technologies, Tokyo, Japan).

## Scanning electron microscopy

Tissue samples for observation by a scanning electron microscope (SEM) were prepared in accordance with the osmium maceration methods described previously [48]. Briefly, the samples biopsied from the liver of the experimental animals were cut into small pieces and immediately immersed into a fixative mixture of 0.5% PFA and 0.5% glutaraldehyde in 0.1 M PB (pH 7.4), for 30 min at 4°C. After fixation, the tissue blocks were directly immersed in 1% OsO<sub>4</sub> in 0.1 M PB for 6 h at 4°C. The samples were then washed thoroughly with 0.1 M PB three times, immersed in 25% and 50% dimethyl sulfoxide for 30 min each for cryoprotection, and frozen on a metal plate deeply chilled with liquid nitrogen. The frozen liver blocks were cracked into 2 pieces with a screwdriver and a hammer and transferred into 50% dimethyl sulfoxide for thawing. After freeze cracking, the samples were washed 3 times in 0.1 M PB and then transferred to 0.1% OsO<sub>4</sub> diluted with 0.1 M PB for 100 h at 20°C under light for osmium maceration. The macerated tissues were immersed in 1% OsO<sub>4</sub> in 0.1 M PB for 1 h for further fixation. After rinsing with 0.1 M PB, the samples were treated with 1% tannic acid in 0.1 M PB and then with 1% OsO<sub>4</sub> in 0.1 M PB for conductive staining. The conductive-stained samples were then dehydrated in ascending concentrations of ethanol (70%, 80%, 90%, 95%, and 100%), transferred into isoamyl acetate, and dried in a critical point dryer (HCP-2; Hitachi Koki Co., Ltd., Tokyo, Japan) using liquid CO<sub>2</sub>. The dried samples were mounted onto an aluminum metal plate and coated with platinum-palladium in an ion sputtering device (E1010; Hitachi Koki Co., Ltd.). After the process described above, the specimens were observed using a field emission SEM (S-4100; Hitachi High Technologies).

The relative frequency (RF) of abnormal mitochondria was calculated from SEM images with a magnification of  $\times 10,000$ ; representative 3 images were taken from each sample, and subsequently RF of abnormal mitochondria was calculated in each image. Mitochondrial area measurements were generated from SEM images with a magnification of  $\times 10,000$ ; representative images were taken from each sample of a minimum of 3 surfaces apart within the tissue block and hepatocyte mitochondria were analyzed. ImageJ software was used to calculate the area by drawing around of each individual mitochondrion analyzed. At least 300 measurements for each experimental group were generated.

## Immunofluorescence microscopy

For immunofluorescence microscopy, the samples biopsied from the liver of the experimental animals were cut into small pieces and immediately transferred into a fixative mixture of 4% PFA in 0.1 M PB (pH 7.4) containing 4% sucrose for 2 h at 4°C. After washing thoroughly with 0.1 M PB containing 7.5% sucrose, the samples were immersed sequentially in 15% sucrose (for 6 h) and 30% sucrose (for 12 h) solutions buffered in 0.1 M PB at 4°C, and then the tissue blocks were frozen at -30°C in the Tissue-Tek O.C.T. compound (Sakura Finetek, Tokyo, Japan). Tissue sections of 15  $\mu$ m thickness were cut from the frozen tissue blocks with a cryostat (Leica Microsystems GmbH, Wetzlar, Germany) and mounted on microscope glass slides. These sections were treated with a 0.05% citraconic anhydride solution (Immunosaver; Nissin EM Co., Ltd., Tokyo, Japan) for 30 min at 60°C for antigen retrieval [50]. The tissue sections were permeabilized with a 0.2% Triton X-100 solution for 10 min at 20°C and then incubated with 2% normal donkey serum (30 min, 20°C) for blocking. After these pretreatments, tissue sections were incubated with a mixture of primary antibodies of different species (rabbit and mouse origin) for 16 h at 20°C. The sections were subsequently incubated with a mixture of the appropriate sets of Alexa Fluor 488- and 594-labeled secondary antibodies for 3 h at 20°C. Between each step, the sections on the microscopic slides were washed 3 times with 0.01 M PB (pH 7.4) containing 0.5 M NaCl and 0.1% Tween 20. After nuclear counter staining with

4'-6-diamidino-2-phenylindole, the coverslips were then mounted onto the tissue sections in 90% glycerol (vol/vol in PBS) containing 0.1% p-phenylenediamine dihydrochloride (Sigma-Aldrich). The stained sections were viewed with a confocal laser microscope (FV-1000D; Olympus, Tokyo, Japan).

## Statistical analysis

Data in the text and figures represent the means  $\pm$  SEM. Unpaired two-tailed t tests were used to compare the significance of differences between two groups.

## Results

### Observation of intracellular ultrastructure of hepatocytes by TEM and SEM

First, we examined the correspondence of the findings on TEM and SEM observation. At low magnification, TEM observation of hepatocytes in control liver revealed that they were basically mononuclear and possessed large numbers of oval or sausage-shaped mitochondria (Fig 2A). The hepatocytes had extensive endoplasmic reticulum in their overall cytoplasm, and their nuclear shape was a regular ellipse and their chromatin distributed uniformly (Fig 2A). The relationships between the cells appeared to be intact, as normal bile canaliculi with microvilli was formed by the plasma membrane of contiguous hepatocytes, which had a well-developed microvillus border. These hepatocytes and normal endothelial cells lined the space of Disse. These findings observed with a TEM corresponded relatively well to the low-magnification findings on observation with an SEM of the freeze-fractured surfaces of the control liver processed with osmium maceration. In addition, SEM observation clearly showed the details of the bile canaliculi, spaces of Disse, and intra-cisternal spaces of the membranous organelles, including some 3D conformation information (Fig 2B).

High-magnification observation with a TEM revealed that the nuclear envelope was clear and smooth, and reticulated-smooth endoplasmic reticulum was abundant in hepatocytes (Fig 2C). In addition, TEM observation showed that the mitochondria had normal inner and outer membranes and sparse cristae in the hepatocytes (Fig 2C, colored green). Additional observation with an SEM revealed that the well-developed tubular cristae connected mutually and occasionally (Fig 2D, open arrows). These data clearly showed well correspondence of observation of TEM and SEM. Furthermore, the SEM observation could demonstrate the 3D detail of intracellular organelles, which include the cristae of mitochondria in hepatocytes.

### Changes in the ultrastructure of organelles within hepatocytes after warming ischemia

After 1 h of warming ischemia, the color of the porcine liver samples had changed to dark red, macroscopically. Along with these changes in the appearance, the intra-cellular ultrastructure of hepatocytes was distorted. The low-magnification findings on observation with an SEM of the freeze-fractured surfaces of the liver after 1 h of warming ischemia processed with osmium maceration showed the contact between the hepatocytes had slightly loosened, both at the microvillus borders and at the junctions with sinusoidal endothelial cells. Generally, the endoplasmic reticulum increases in size and tends to have a lamellar morphology in hepatocytes (Fig 3A). However, the hepatic architecture and the relationships between the hepatocytes were largely maintained, as the cells formed normal bile canaliculi and interfaces. Noteworthy, the abnormal large vacuoles appeared in the hepatocytes (Fig 3A, colored red). These vacuoles were generally located near the nucleus but also appeared elsewhere in the cytoplasm.

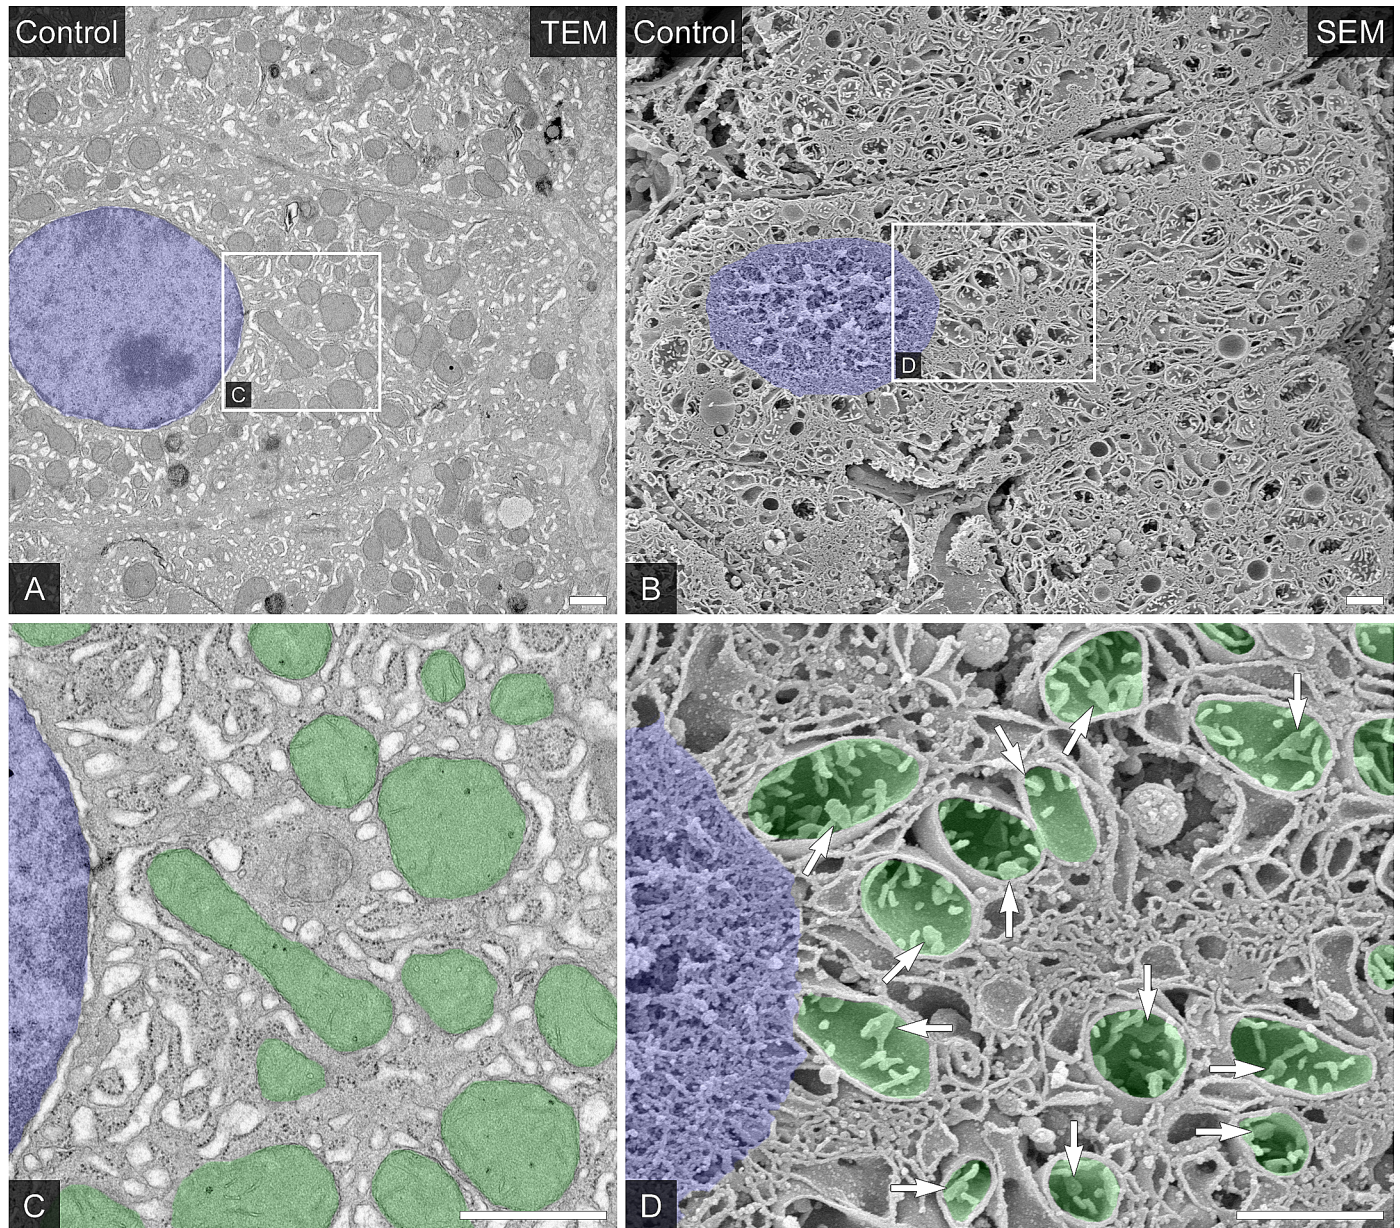

**Fig 2. The ultrastructure of the endomembrane structure in the hepatocytes of the control liver.** (A and C) Typical hepatocytes were identified in the ultrathin sections of the Epon 812-embedded control liver tissue (A). Nucleus was colored blue. The partial area indicated in A was further photographed at a higher magnification (C). Nucleus was colored blue and mitochondria were colored green. Bars = 1  $\mu$ m. (B and D) Similar typical hepatocytes in osmium-macerated control porcine liver tissues were viewed with a scanning electron microscope (B). Nucleus was colored blue. The p area indicated in B was further photographed at a higher magnification (D). Nucleus was colored blue and mitochondria were colored green. Open arrows indicated cristae of mitochondria. Bars = 1  $\mu$ m.

<https://doi.org/10.1371/journal.pone.0186352.g002>

Occasionally, the large, abnormal vacuoles contained rather small vacuoles with a smooth surface (Fig 3A, asterisk). Observation of the freeze-fractured surface of these small vacuoles revealed a double membrane and the presence of small, empty vesicles (Panel A in S1 Fig). Interestingly, the internal space between the double membranes of a part of small vesicles was occasionally connected to the lysosome-like structure in cytoplasm (Panel A in S1 Fig, open arrowheads).

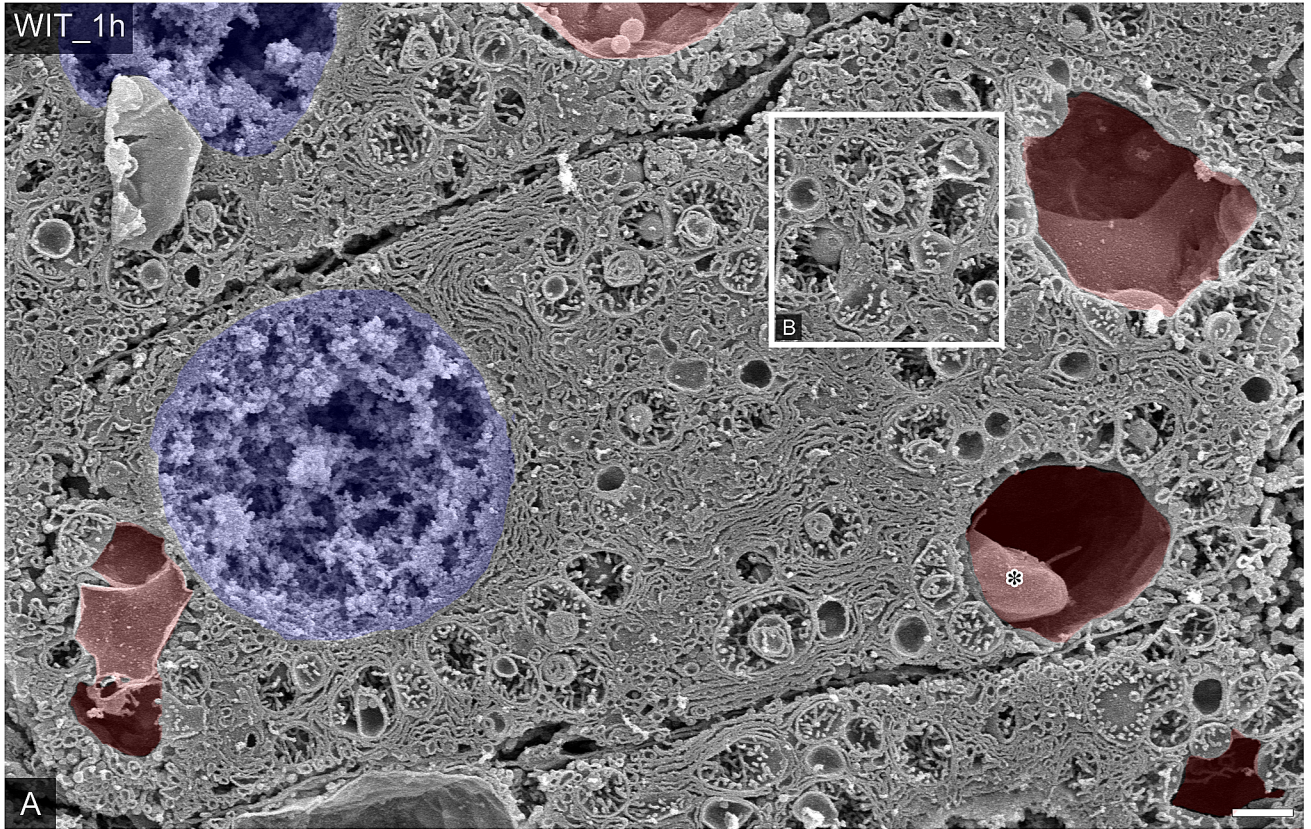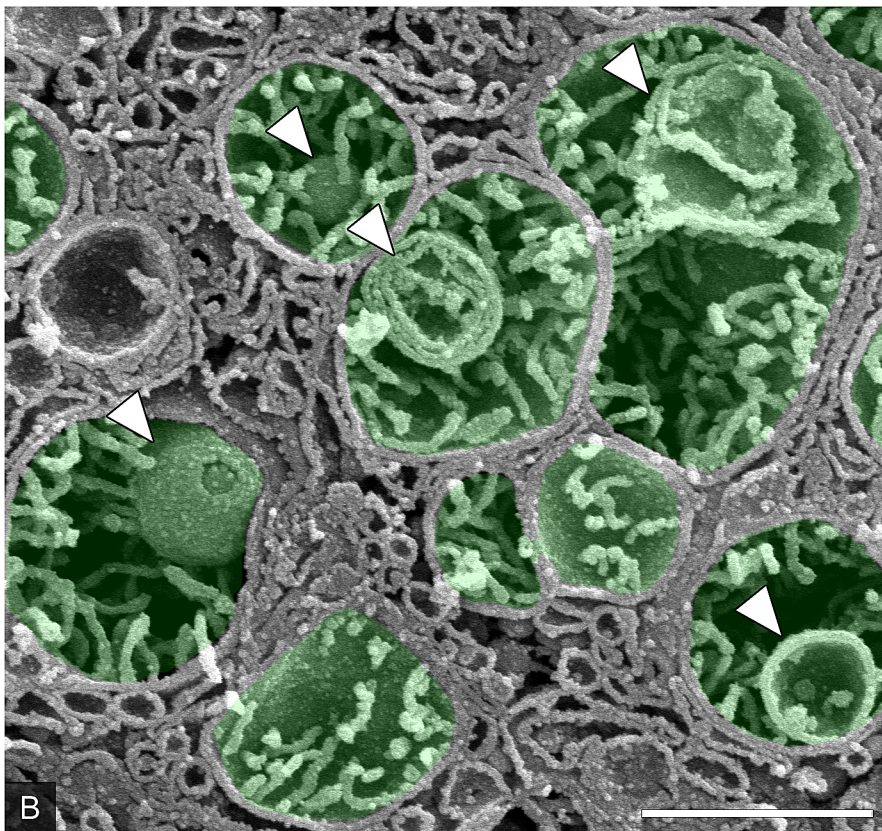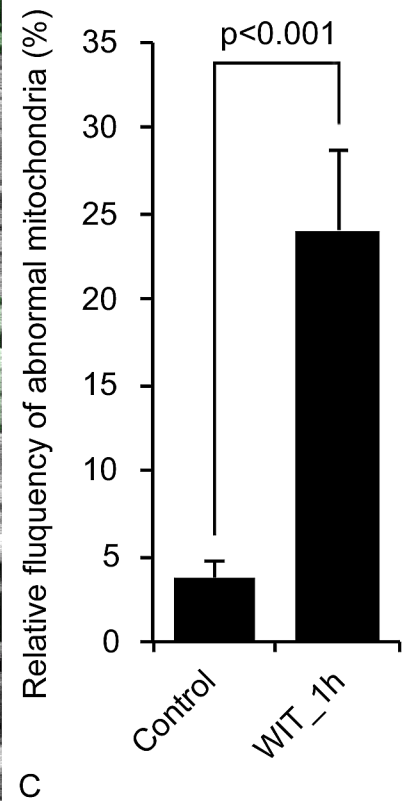



**Fig 3. Changes in the ultrastructure of the endomembrane systems in porcine hepatocytes after warm ischemia.** (A and B) Representative hepatocytes were observed by SEM in the osmium-macerated porcine liver graft samples after warm ischemia for 60 minutes. Nucleus was colored blue and abnormal vacuoles were colored red. Asterisks indicated the internal vacuole in an abnormal vacuole. The partial area indicated in A was further photographed at a higher magnification (B). Mitochondria were colored green. Intra-mitochondrial abnormal vesicles were indicated by open arrowheads. (C) Abnormal mitochondria was counted in SEM images (9–11 views of each groups, N = 3). Data represents as the means  $\pm$  SEM. Unpaired two-tailed t-tests were used ( $p < 0.001$ ). Bars = 1  $\mu\text{m}$ .

<https://doi.org/10.1371/journal.pone.0186352.g003>

Even more interestingly, an SEM observation showed that the mitochondria in the hepatocytes were slightly swollen, with abnormal vesicles found in each mitochondrion. At high magnification, some intra-mitochondria vesicles had multi-lamellar membranes (Fig 3B, open arrowheads). Although these abnormal mitochondria were rarely observed in control, the RF was significantly increased in the liver after 1 h of warming ischemia (Fig 3C, control vs. WIT\_1h,  $3.75 \pm 0.93$  vs.  $24.05 \pm 4.59$  percent per image,  $*P < 0.001$ ). Observation of other hepatocytes revealed that the outer membrane of the mitochondria had invaginated into the lumen with cytoplasm or an endoplasmic reticulum (Panel B in S1 Fig, open arrows).

### Comparison of changes in the intracellular ultrastructure with hypothermic and midthermic machine perfusion

The macroscopic appearance of the liver samples preserved with HMP (Group A) or MMP (Group B) similarly became pale after 4 h; however, the ultrastructure of the hepatocytes was significantly different between each condition followed the extent of hepatocellular damage in liver graft. As we reported previously [38], the value of lactate dehydrogenase (LDH) and aspartate aminotransferase (AST) in perfusate showed that the MMP significantly suppressed the increasing of the hepatic enzyme release compared to HMP (Panel A in S3 Fig. (LDH); HMP\_4h vs. MMP\_4h,  $4760 \pm 856$  vs.  $1970 \pm 173$  IU/L, Panel B in S3 Fig. (AST); HMP\_4h vs. MMP\_4h,  $3170 \pm 250$  vs.  $2120 \pm 198$  IU/L,  $*P < 0.05$ , respectively). Correspondingly, observation by SEM revealed that the hepatic architecture and the connections between the hepatocytes were no longer visible, as the microvillus borders of the hepatocytes showed abnormal compaction and reduced volumes of canaliculi in the liver in Group A (Fig 4A).

Furthermore, the presence of mitochondria in the cytoplasm and reticulated endoplasmic reticulum was observed in the hepatocytes in Group A (Fig 4A). At higher magnification, strongly swollen mitochondria and atrophy of cristae appeared in the hepatocytes in Group A (Fig 4B, colored green). Despite the disappearance of the large vacuoles observed at 60 min after warming ischemia, we did observe small vacuoles scattered around the cytoplasm in hepatocytes from Group A that wrapped the swollen mitochondria incompletely (Fig 4A and 4B, colored red). In contrast, in Group B, although the connections between the hepatocytes had loosened, the hepatocytes appeared more visible, as the canaliculi were of normal volume and the mitochondria appeared to have a normal function (Fig 5A). Interestingly, numerous abnormal large vacuoles remained in the cytoplasm of hepatocytes after 4 h of MMP (Fig 5A and 5B, colored red). Electron microscopy occasionally visualized abundant vacuoles and membranous structures sequestering cellular organelles, just like the autophagosomes in hepatocytes (Fig 5A, asterisks). At high magnification, although the intravacuolar mitochondria were slightly swollen (Fig 5B, colored purple), cytoplasmic mitochondria rather maintained a functional small morphology and the cristae (Fig 5B, colored green). Mitochondrial swelling, generally reflected by an increase of the mitochondrial area is a well-accepted hallmark of dysfunction of this organelle [51,52]. Mitochondria area measurements in hepatocytes showed that the MMP significantly suppressed the increasing of mitochondria area compared to HMP (Fig 5C, HMP\_4h vs. MMP\_4h,  $0.68 \pm 0.02$  vs.  $0.39 \pm 0.02 \mu\text{m}^2$  per mitochondria,  $*P < 0.0001$ ).

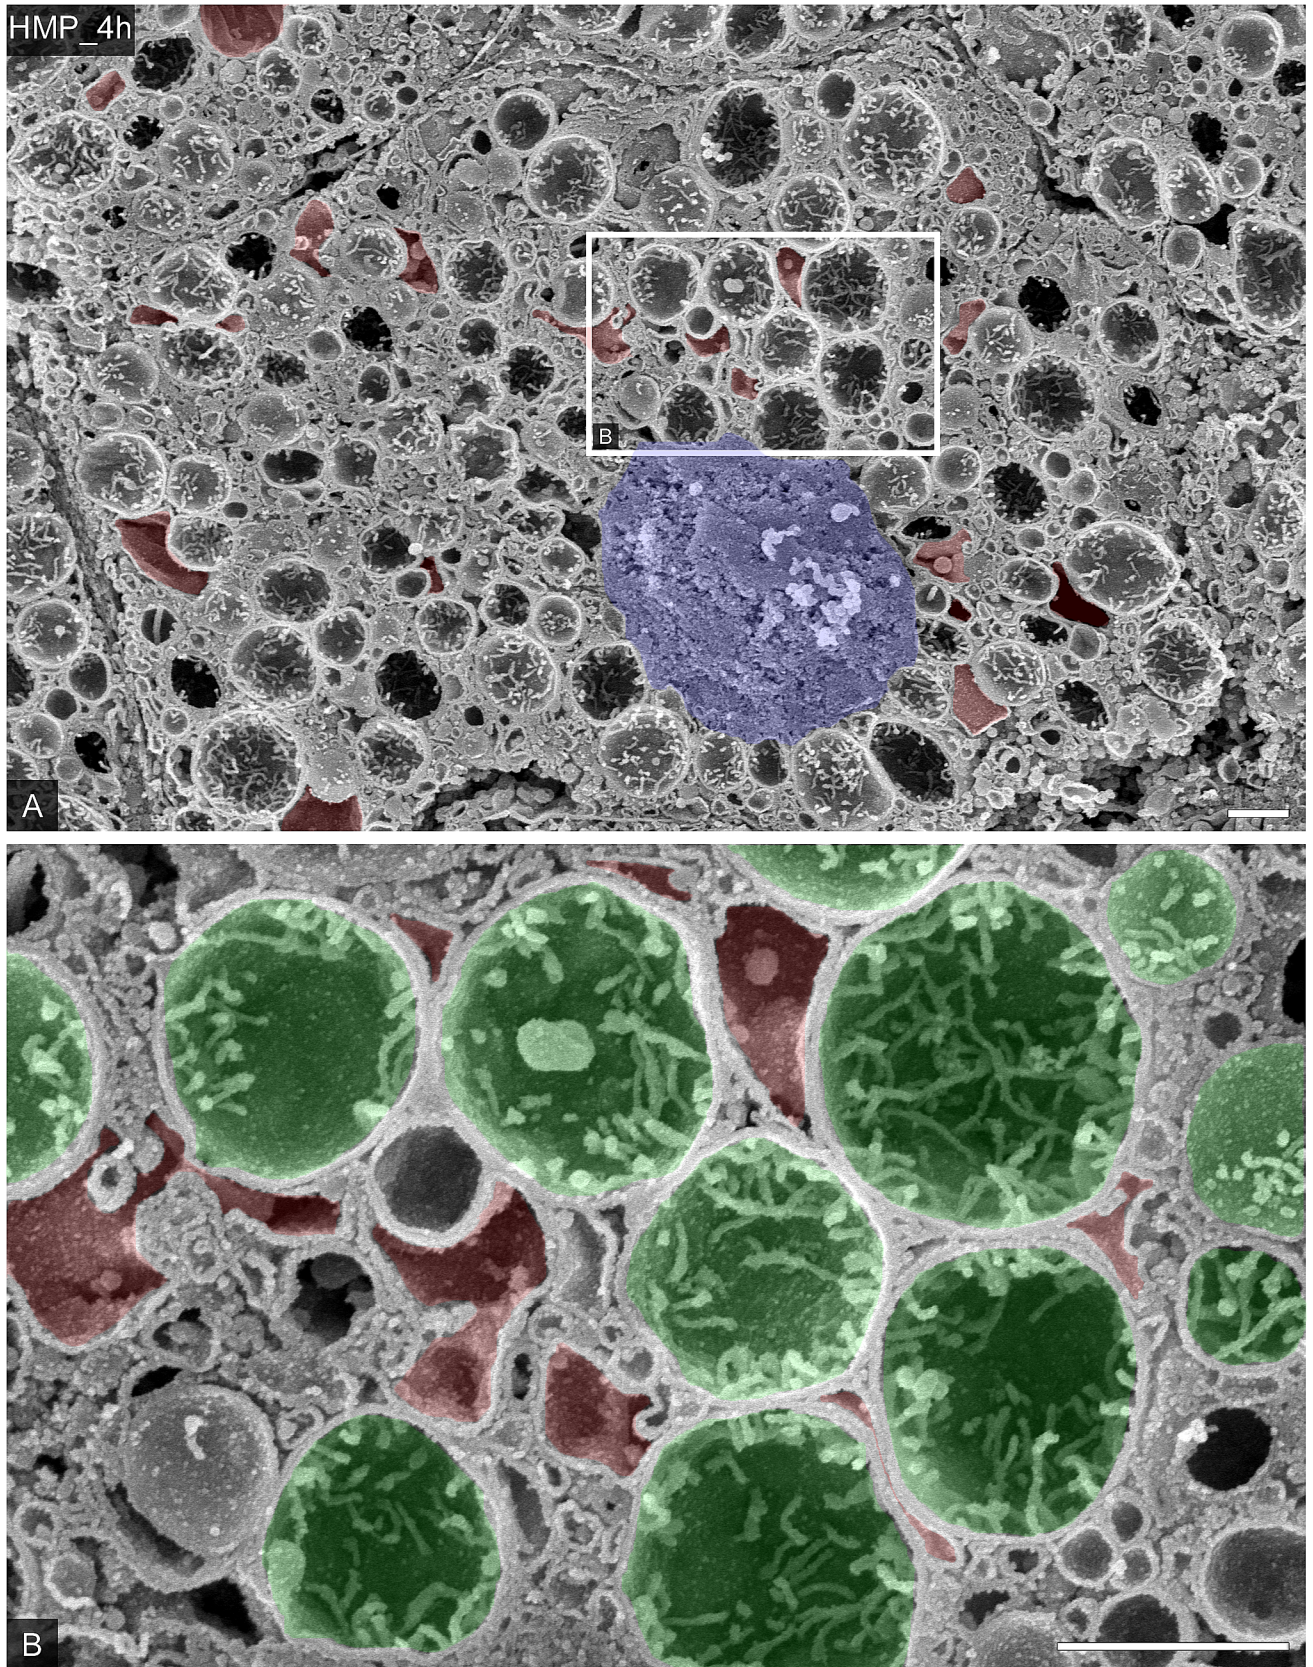

**Fig 4. The ultrastructural alteration in porcine hepatocytes preserved by HMP.** (A) Representative hepatocytes were observed by SEM in the osmium-macerated porcine liver graft samples preserved by HMP for 4 h after 60 minutes of warm ischemia. Nucleus was colored blue and abnormal vacuoles were colored red. The partial area indicated in A was further photographed at a higher magnification (B). Mitochondria were colored green and abnormal vacuoles were colored red. Bars = 1  $\mu$ m.

<https://doi.org/10.1371/journal.pone.0186352.g004>

## Discussion

In this study we confirmed the usefulness of the SEM observation of osmium-macerated tissue samples for description of ultrastructure of hepatocellular organelles, especially the internal architecture of mitochondria (Fig 2). Based on this, we revealed the ultrastructural characteristics along with some 3D information of hepatocytes from porcine liver grafts after warm ischemia and subsequent MP after cardiac death by using SEM. Simple warm ischemia of liver grafts for 60 minutes affects the ultrastructural characteristics of hepatocytes.

One of the abnormal findings was the peculiar appearance of a multilamellar body in mitochondria after warm ischemia (Fig 3B). Similar structures in the hepatocytes of a murine ischemia reperfusion model were reported as autophagic vacuoles on TEM observation [53]. These autophagic vacuoles appeared under the condition of autophagy induction, as warm ischemia and ischemia-reperfusion induced autophagy in hepatocytes [54–56]. Our results revealed that the autophagic vacuoles in mitochondria were formed by invaginations into the matrix space of the mitochondrial outer membrane at the site of contact with the endoplasmic reticulum (Panel B in S1 Fig). This finding is consistent with the fact that autophagosomes are formed at the site of contact of mitochondria with the endoplasmic reticulum [57].

The process of mitochondrial autophagy, termed mitophagy, has several distinct variants. In mitophagy induced by starvation or hypoxia, mitochondria deformation typically occurs in coordination with the sequestration of mitophagosomes. By contrast, in mitophagy induced by the onset of mitochondrial permeability transition (MPT), mitochondrial deformation is not observed [58–60]. In addition, hepatocytes under conditions of hypoxic stress suppress the production of reactive oxygen species (ROS) by the degradation of mitochondria with mitophagy [55]. Therefore, the autophagic vacuoles of mitochondria in hepatocytes suffering warm ischemia might be associated with hypoxia-induced mitophagy. This hypothesis is supported by the fact that the number of autophagic vacuoles in the mitochondria decreases after oxygenation by machine perfusion, regardless of the temperature (Figs 4 and 5).

Autophagy occurs at low basal levels in virtually all cells that perform homeostatic functions, including the removal of damaged organelles such as mitochondria, and is involved in the recycling of denatured proteins and metabolic catabolites [61,62]. Damaged organelles participating in ROS generation, including mitochondria, are sequestered and removed by the autophagic process, and autophagy plays a role in suppression of ROS generation and subsequent apoptosis [63]. Autophagy prevents hepatocyte apoptosis or necrosis under conditions of hypoxia-induced oxidative stress [54,56,64,65]. Considering these facts, it seems that the formation of mitochondrial autophagosomes in hepatocytes during warm ischemia suggested that the autophagy system plays a role in protecting hepatocytes from hypoxic injury.

Another finding was the appearance of huge single-membrane vacuoles in the hepatocytes (Fig 3A). There are a number of reports of the appearance of huge vacuoles in hepatocytes of animal models under hypoxia-induced oxidative stress after warm ischemia or cardiac death [45,66–70]. In addition, the extent of parenchymal vacuolation in warm ischemia liver grafts reflects the severity of hepatocellular damage [71]. On 3D observation using an SEM, we found that the huge vacuoles frequently contained smaller vacuoles within them (Panel A in S1 Fig). SEM observation of the freeze-fractured surface revealed that the intravacuolar vacuoles with double membranes contained vesicles. Furthermore, these intravacuolar vacuoles

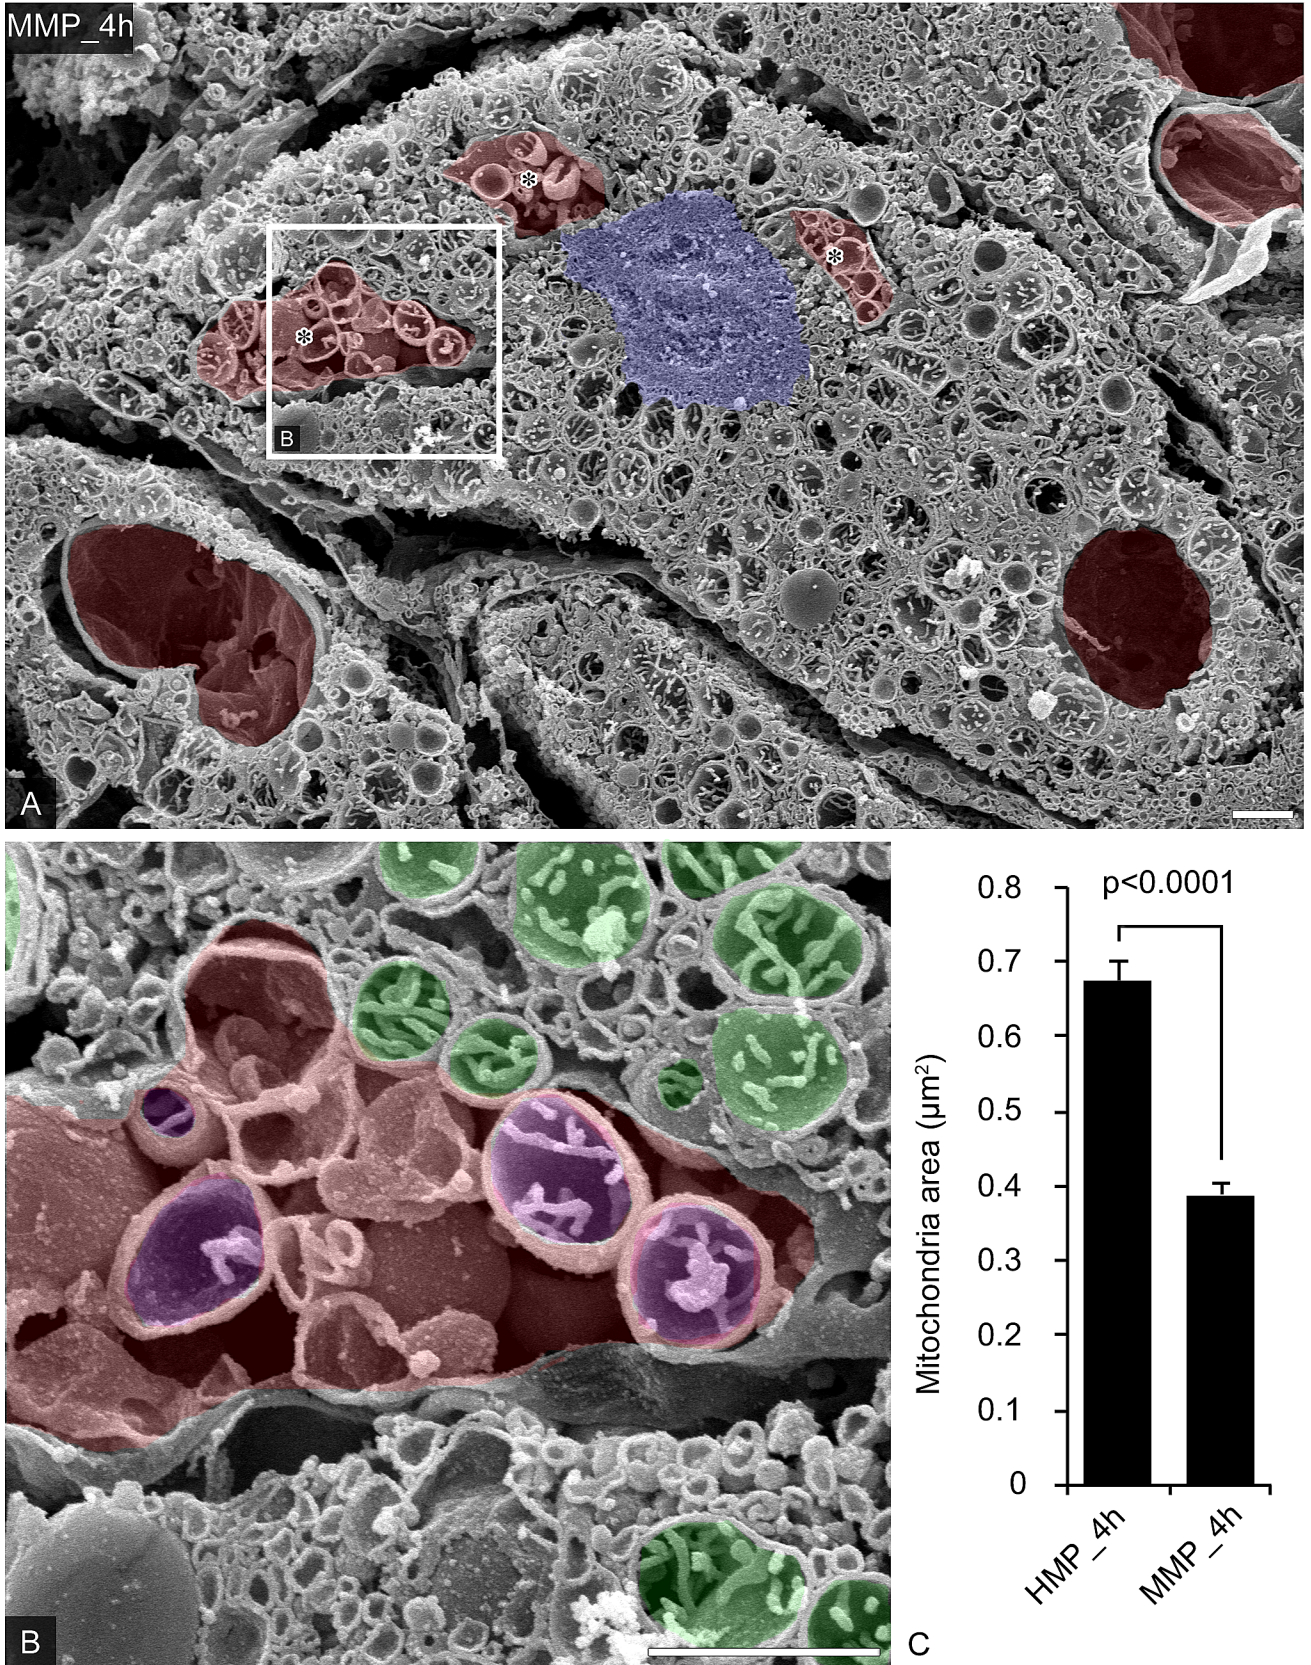

**Fig 5. The ultrastructural characteristics in porcine hepatocytes preserved by MMP.** (A) Representative hepatocytes were observed by SEM in the osmium-macerated porcine liver graft samples preserved by MMP for 4 h after 60 minutes of warm ischemia. Nucleus was colored blue and abnormal vacuoles were colored red. Asterisks indicated the vacuoles include the vesicles and mitochondria. The partial area indicated in A was further photographed at a higher magnification (B). Abnormal vacuoles were colored red. Cytoplasmic mitochondria were colored green and intravacuolar mitochondria were colored purple. (C) Mitochondria areas were measured in SEM images (9–11 views of each groups, N = 3). Data represents as the means  $\pm$  SEM. Unpaired two-tailed t-tests were used ( $p < 0.0001$ ). Bars = 1  $\mu$ m.

<https://doi.org/10.1371/journal.pone.0186352.g005>

were connected to lysosome-like structures in the cytoplasm (Panel A in [S1 Fig](#), open arrowheads). In addition, the appearance of LC3 accumulation corresponding to the vacuoles suggests a relationship between the vacuoles and autophagy (Panel A and B in [S2 Fig](#)). The etiology of vacuolation of hepatocytes has never been completely clarified, but the co-localization of cytochrome C with the accumulation of LC3 suggests that the vacuolation is due to mitochondrial autophagosomes (Panel B in [S2 Fig](#)). This hypothesis is consistent with the theory that autophagy mediates the cellular resistance of hepatocytes to the mitochondrial death pathway by blocking the activation of caspase-8 and subsequent cytoplasmic release of cytochrome C [[72,73](#)].

The alterations of the ultrastructural characteristics in hepatocytes caused by warm ischemia lead to various outcomes depending on the temperature conditions of subsequent MP. For the first example, swelling of mitochondria and dilation of endoplasmic reticulum in hepatocytes are more severe after HMP than MMP relatively. The swelling of mitochondria is induced by the onset of MPT, suggesting that the damage of mitochondria results in the production of ROS [[74](#)]. In addition, the dilation of the endoplasmic reticulum suggests that it's under stress. These differences in the intracellular ultrastructural outcomes in hepatocytes between each MP type give an explanation for the results of our previous study showing that the AST and LDH levels in the effluent were lower in WMP compared with HMP [[39,38](#)].

Second, membrane structures enclosing some of the organelles were discerned in the hepatocytes after MMP for 4 h. These membrane structures comprised a single membrane, similar to the vacuoles that appeared after warm ischemia. TEM observation of post-mortem rat hepatocytes has also shown the presence of vacuoles surrounding organelles [[70](#)]. Considering these facts, it seems that the membrane structures enclosing some of the organelles is associated to the vacuoles appeared after warm ischemia. In addition, a comparison of the immunohistochemistry findings and SEM observations showed that the large accumulations of LC3 co-localized with cytochrome C in hepatocytes after MMP corresponded well with the membrane structures enclosing mitochondria (Panel D in [S2 Fig](#)). These findings suggest that the membrane structures isolating the organelles, including the mitochondria, are related to autophagy. Some studies have reported that the WMP prompts energy metabolism recovery [[75,76](#)]. In addition, controlled oxygenated rewarming, which is similar to MMP, resulted in significantly increased gene expression and protein levels of autophagy-related beclin-1 [[77](#)]. Therefore, it seems that the membrane structures isolating the organelles, including the mitochondria, are related to the induction of macroautophagy.

Third, we found that the endoplasmic reticulum membrane was frequently attached to the surface of the swollen mitochondria after HMP for 4 h ([Fig 4B](#)). Immunohistochemistry showed the presence of a number of small accumulations of LC3 co-localized with cytochrome C in the cytoplasm of these hepatocytes (Panel C in [S2 Fig](#)). Salas et al. found that hypothermia was a decisive element in the production of hepatic autophagy in rats [[78,79](#)]. In addition, the appearances of swollen mitochondria in the hepatocyte of mice under conditions of hypothermia have suggested that the damage to mitochondria is induced by the hypothermic condition itself [[78](#)]. Extended times of HMP may also be subject to particular disadvantages and limitations with regard to endoplasmic stress [[80,81](#)]. Therefore, it seems that the hypothermic

conditions of HMP induce mitophagy without mitochondrial deformation, due to the onset of MPT [59]. The validity and relevance of this hypothesis need further confirmation in future studies.

There is a limitation to our study. The relatively high level of the LDH and AST in perfusate of MMP suggest that the considerable hepatocellular damage exist even in the more protective method, MMP in this study. The warm MP with rewarming is promising, as more and more researchers are publishing results preferring these temperature settings [82]. However it has not been sufficiently defined the rewarming velocity of liver grafts, the critical temperature the liver should reach, and the period of warm MP needed to adjust metabolic parameters [82]. Therefore, it is necessary that our morphological analysis should be done on the more protective modified WMP to clarify the protective mechanism of the MP on the liver graft in future.

In conclusion, the temperature conditions for WMP alleviate the damage of the hepatic graft via ultrastructural changes of mitochondria potentially associated with autophagy in hepatocytes. This alleviation potentially depends on the metabolically active scenario where organs are supplied with nutrients and oxygen to re-establish homeostasis facilitated by WMP. However, autophagy-associated hepatocyte death has been reported to trigger liver graft dysfunction, indicating that the effect of autophagy on hepatocytes is still controversial [16]. Further physiological studies are needed to clarify the detailed mechanisms of the ultrastructural changes and autophagy in hepatocytes under various temperature conditions of perfusion preservation of liver grafts for more appropriate preservation of liver grafts donated after cardiac death.

## Supporting information

**S1 Fig. The appearance of abnormal vacuoles and ultrastructural changes in the mitochondria in porcine hepatocytes after warm ischemia.** (A) Representative abnormal vacuoles were observed in porcine hepatocytes using SEM after warm ischemia for 60 minutes. An abnormal vacuole was colored red. A lysosome-like structure was colored blue. Open arrowheads indicated the connection between the abnormal vacuole and lysosome-like structure. Simultaneously, the abnormal invagination of the mitochondrial outer membrane into the matrix space was also observed (B). Mitochondria were colored green. Open arrows indicate invaginations of mitochondria. Bars = 1  $\mu$ m.

(TIF)

**S2 Fig. The changes in the intracellular distribution of LC3 and cytochrome C in porcine hepatocytes after warm ischemia and subsequent preservation by HMP or MMP.** (A-D) Tissue sections (thickness: 15  $\mu$ m) of the sample of porcine liver biopsied at the time of pre-DCD (A), after 60 minutes of warm ischemia (B), and 4 h after starting the preservation by HMP (C) or MMP (D) were simultaneously immunostained with rabbit polyclonal anti-LC3 (visualized with Alexa Fluor 488; green pseudocolor in A-D) and mouse monoclonal anti-cytochrome C (visualized with Alexa Fluor 594; red pseudocolor in A-D) antibodies. The cell nucleus was also stained with DAPI (Sigma-Aldrich) and viewed with a 405-nm laser source (blue). Bar = 10  $\mu$ m.

(TIF)

**S3 Fig. The changes in the perfusate enzymes after warm ischemia and subsequent preservation by HMP or MMP.** (A) Levels of lactate dehydrogenase (LDH), and (B) levels of aspartate aminotransferase (AST) in the perfusate at 4 hours after hypothermic and midthermic machine perfusion preservation. Data represents as the means  $\pm$  SEM. Unpaired two-tailed t-tests were used ( $p < 0.05$ ).

(TIF)

## Acknowledgments

We thank all of the lab members and colleagues for their helpful suggestions and assistance in the experiments. We are extremely grateful to Mr. Ling Tong Meng, Mr. Yoshiyasu Satake and Ms. Kumiko Uchida for carrying out all the research.

## Author Contributions

**Conceptualization:** Naoto Matsuno, Hiroyuki Furukawa.

**Funding acquisition:** Hiroki Bochimoto, Naoto Matsuno.

**Investigation:** Hiroki Bochimoto, Naoto Matsuno, Yo Ishihara, Tatsuya Shonaka, Yuji Nishikawa, Tsuyoshi Watanabe.

**Resources:** Yoshiki Hira.

**Supervision:** Naoto Matsuno.

**Writing – original draft:** Hiroki Bochimoto.

**Writing – review & editing:** Daisuke Koga.

## References

1. Moers C, Pirenne J, Paul A, Ploeg RJ, Machine Preservation Trial Study Group. Machine perfusion or cold storage in deceased-donor kidney transplantation. *N Engl J Med*. 2012; 366: 770–1. <https://doi.org/10.1056/NEJMc1111038> PMID: 22356343
2. Matsuno N, Sakurai E, Uchiyama M, Kozaki K, Miyamoto K, Kozaki M, et al. Role of machine perfusion preservation in kidney transplantation from non-heartbeating donors. *Clin Transplant*. 1998; 12: 1–4. PMID: 9541415
3. Echeverri J, Selzner M. “In 10 years” debate: Con-machine perfusion will be limited to specific situations (Steatotic, donation after circulatory death). *Liver Transpl*. 2016; 22: 29–32. <https://doi.org/10.1002/lt.24622> PMID: 27588758
4. Westerkamp AC, Mahboub P, Meyer SL, Hottenrott M, Ottens PJ, Wiersema-Buist J, et al. End-ischemic machine perfusion reduces bile duct injury in donation after circulatory death rat donor livers independent of the machine perfusion temperature. *Liver Transpl*. 2015; 21: 1300–11. <https://doi.org/10.1002/lt.24200> PMID: 26097213
5. Dutkowski P, de Rougemont O, Clavien P-A. Machine perfusion for “marginal” liver grafts. *Am J Transplant*. 2008; 8: 917–24. <https://doi.org/10.1111/j.1600-6143.2008.02165.x> PMID: 18416733
6. Goldaracena N, Barbas AS, Selzner M. Normothermic and subnormothermic ex-vivo liver perfusion in liver transplantation. *Curr Opin Organ Transplant*. 2016; 21: 315–21. <https://doi.org/10.1097/MOT.0000000000000305> PMID: 27093224
7. Guarrera J V., Estevez J, Boykin J, Boyce R, Rashid J, Sun S, et al. Hypothermic machine perfusion of liver grafts for transplantation: technical development in human discard and miniature swine models. *Transplant Proc*. 2005; 37: 323–5. <https://doi.org/10.1016/j.transproceed.2004.12.094> PMID: 15808631
8. Schlegel A, Rougemont O De, Graf R, Clavien PA, Dutkowski P. Protective mechanisms of end-ischemic cold machine perfusion in DCD liver grafts. *J Hepatol*. 2013; 58: 278–286. <https://doi.org/10.1016/j.jhep.2012.10.004> PMID: 23063573
9. Guarrera J V., Henry SD, Samstein B, Reznik E, Musat C, Lukose TI, et al. Hypothermic machine preservation facilitates successful transplantation of “orphan” extended criteria donor livers. *Am J Transplant*. 2015; 15: 161–9. <https://doi.org/10.1111/ajt.12958> PMID: 25521639
10. Guarrera J V., Henry SD, Samstein B, Odeh-Ramadan R, Kinkhabwala M, Goldstein MJ, et al. Hypothermic machine preservation in human liver transplantation: the first clinical series. *Am J Transplant*. 2010; 10: 372–81. <https://doi.org/10.1111/j.1600-6143.2009.02932.x> PMID: 19958323
11. Dutkowski P, Furrer K, Tian Y, Graf R, Clavien P-A. Novel short-term hypothermic oxygenated perfusion (HOPE) system prevents injury in rat liver graft from non-heart beating donor. *Ann Surg*. 2006; 244: 968–76–7. <https://doi.org/10.1097/01.sla.0000247056.85590.6b> PMID: 17122622

12. de Rougemont O, Breitenstein S, Leskosek B, Weber A, Graf R, Clavien P-A, et al. One hour hypothermic oxygenated perfusion (HOPE) protects nonviable liver allografts donated after cardiac death. *Ann Surg.* 2009; 250: 674–83. <https://doi.org/10.1097/SLA.0b013e3181bcb1ee> PMID: 19806056
13. Op den Dries S, Sutton ME, Karimian N, de Boer MT, Wiersema-Buist J, Gouw ASH, et al. Hypothermic oxygenated machine perfusion prevents arteriolonecrosis of the peribiliary plexus in pig livers donated after circulatory death. *PLoS One.* 2014; 9: e88521. <https://doi.org/10.1371/journal.pone.0088521> PMID: 24551114
14. Westerkamp AC, Karimian N, Matton APM, Mahboub P, van Rijn R, Wiersema-Buist J, et al. Oxygenated Hypothermic Machine Perfusion After Static Cold Storage Improves Hepatobiliary Function of Extended Criteria Donor Livers. *Transplantation.* 2016; 100: 825–35. <https://doi.org/10.1097/TP.0000000000001081> PMID: 26863473
15. Kim JS, Boudjema K, D'Alessandro A, Southard JH. Machine perfusion of the liver: maintenance of mitochondrial function after 48-hour preservation. *Transplant Proc.* 1997; 29: 3452–4. PMID: 9414787
16. Peralta C, Jiménez-Castro MB, Gracia-Sancho J. Hepatic ischemia and reperfusion injury: effects on the liver sinusoidal milieu. *J Hepatol. European Association for the Study of the Liver;* 2013; 59: 1094–106. <https://doi.org/10.1016/j.jhep.2013.06.017> PMID: 23811302
17. Perk S, Izamis M-L, Tolboom H, Uygun B, Berthiaume F, Yarmush ML, et al. A metabolic index of ischemic injury for perfusion-recovery of cadaveric rat livers. *PLoS One.* 2011; 6: e28518. <https://doi.org/10.1371/journal.pone.0028518> PMID: 22194843
18. Perk S, Izamis M-L, Tolboom H, Uygun B, Yarmush ML, Uygun K. A fitness index for transplantation of machine-perfused cadaveric rat livers. *BMC Res Notes.* 2012; 5: 325. <https://doi.org/10.1186/1756-0500-5-325> PMID: 22731806
19. Karangwa SA, Dutkowski P, Fontes P, Friend PJ, Guarrera J V., Markmann JF, et al. Machine Perfusion of Donor Livers for Transplantation: A Proposal for Standardized Nomenclature and Reporting Guidelines. *Am J Transplant.* 2016; 1967: 2932–2942. <https://doi.org/10.1111/ajt.13843> PMID: 27129409
20. Bruinsma BG, Yeh H, Ozer S, Martins PN, Farmer A, Wu W, et al. Subnormothermic machine perfusion for ex vivo preservation and recovery of the human liver for transplantation. *Am J Transplant.* 2014; 14: 1400–9. <https://doi.org/10.1111/ajt.12727> PMID: 24758155
21. Selzner M, Goldaracena N, Echeverri J, Kathis JM, Linares I, Selzner N, et al. Normothermic ex vivo liver perfusion using steen solution as perfusate for human liver transplantation: First North American results. *Liver Transpl.* 2016; 22: 1501–1508. <https://doi.org/10.1002/lt.24499> PMID: 27339754
22. Op den Dries S, Karimian N, Westerkamp AC, Sutton ME, Kuipers M, Wiersema-Buist J, et al. Normothermic machine perfusion reduces bile duct injury and improves biliary epithelial function in rat donor livers. *Liver Transpl.* 2016; 22: 994–1005. <https://doi.org/10.1002/lt.24436> PMID: 26946466
23. Barbas AS, Goldaracena N, Dib MJ, Selzner M. Ex-vivo liver perfusion for organ preservation: Recent advances in the field. *Transplant Rev (Orlando). Elsevier Inc.;* 2016; 30: 154–60. <https://doi.org/10.1016/j.ttre.2016.03.002> PMID: 27158081
24. Nassar A, Liu Q, Farias K, Buccini L, Baldwin W, Bennett A, et al. Impact of Temperature on Porcine Liver Machine Perfusion From Donors After Cardiac Death. *Artif Organs.* 2016; 40: 999–1008. <https://doi.org/10.1111/aor.12699> PMID: 27086771
25. Goldaracena N, Echeverri J, Spetzler VN, Kathis JM, Barbas AS, Louis KS, et al. Anti-inflammatory signaling during ex vivo liver perfusion improves the preservation of pig liver grafts before transplantation. *Liver Transpl.* 2016; 22: 1573–1583. <https://doi.org/10.1002/lt.24603> PMID: 27556578
26. Bruinsma BG, Avruch JH, Weeder PD, Sridharan G V., Uygun BE, Karimian NG, et al. Functional Human Liver Preservation and Recovery by Means of Subnormothermic Machine Perfusion. *J Vis Exp.* 2015; 1–5. <https://doi.org/10.3791/52777> PMID: 25938299
27. Liu Q, Nassar A, Farias K, Buccini L, Baldwin W, Mangino M, et al. Sanguineous normothermic machine perfusion improves hemodynamics and biliary epithelial regeneration in donation after cardiac death porcine livers. *Liver Transpl.* 2014; 20: 987–99. <https://doi.org/10.1002/lt.23906> PMID: 24805852
28. Knaak JM, Spetzler VN, Goldaracena N, Boehnert MU, Bazerbachi F, Louis KS, et al. Subnormothermic ex vivo liver perfusion reduces endothelial cell and bile duct injury after donation after cardiac death pig liver transplantation. *Liver Transpl.* 2014; 20: 1296–305. <https://doi.org/10.1002/lt.23986> PMID: 25179693
29. Nassar A, Liu Q, Farias K, D'Amico G, Tom C, Grady P, et al. Ex Vivo Normothermic Machine Perfusion Is Safe, Simple, and Reliable: Results From a Large Animal Model. *Surg Innov.* 2014; 1553350614528383-. <https://doi.org/10.1177/1553350614528383> PMID: 24694840
30. Boehnert MU, Yeung JC, Bazerbachi F, Knaak JM, Selzner N, McGilvray ID, et al. Normothermic acellular ex vivo liver perfusion reduces liver and bile duct injury of pig livers retrieved after cardiac death. *Am J Transplant.* 2013; 13: 1441–9. <https://doi.org/10.1111/ajt.12224> PMID: 23668775



31. op den Dries S, Karimian N, Sutton ME, Westerkamp AC, Nijsten MWN, Gouw ASH, et al. Ex vivo normothermic machine perfusion and viability testing of discarded human donor livers. *Am J Transplant*. 2013; 13: 1327–35. <https://doi.org/10.1111/ajt.12187> PMID: 23463950
32. Bruinsma BG, Berendsen TA, Izamis M-L, Yarmush ML, Uygun K. Determination and extension of the limits to static cold storage using subnormothermic machine perfusion. *Int J Artif Organs*. 2013; 36: 775–80. <https://doi.org/10.5301/ijao.5000250> PMID: 24338652
33. Tolboom H, Izamis M-L, Sharma N, Milwid JM, Uygun B, Berthiaume F, et al. Subnormothermic machine perfusion at both 20°C and 30°C recovers ischemic rat livers for successful transplantation. *J Surg Res*. 2012; 175: 149–56. <https://doi.org/10.1016/j.jss.2011.03.003> PMID: 21550058
34. Berendsen TA, Bruinsma BG, Lee J, D'Andrea V, Liu Q, Izamis M-L, et al. A simplified subnormothermic machine perfusion system restores ischemically damaged liver grafts in a rat model of orthotopic liver transplantation. *Transplant Res*. 2012; 1: 6. <https://doi.org/10.1186/2047-1440-1-6> PMID: 23369351
35. Tolboom H, Pouw RE, Izamis M-L, Milwid JM, Sharma N, Soto-Gutierrez A, et al. Recovery of warm ischemic rat liver grafts by normothermic extracorporeal perfusion. *Transplantation*. 2009; 87: 170–7. <https://doi.org/10.1097/TP.0b013e318192df6b> PMID: 19155970
36. Tolboom H, Milwid JM, Izamis ML, Uygun K, Berthiaume F, Yarmush ML. Sequential cold storage and normothermic perfusion of the ischemic rat liver. *Transplant Proc*. 2008; 40: 1306–9. <https://doi.org/10.1016/j.transproceed.2008.03.100> PMID: 18589093
37. Fondevila C, Hessheimer AJ, Maathuis M-HJ, Muñoz J, Taurá P, Calatayud D, et al. Superior preservation of DCD livers with continuous normothermic perfusion. *Ann Surg*. 2011; 254: 1000–7. <https://doi.org/10.1097/SLA.0b013e31822b8b2f> PMID: 21862925
38. Furukori M, Matsuno N, Meng LT, Shonaka T, Nishikawa Y, Imai K, et al. Subnormothermic Machine Perfusion Preservation With Rewarming for Donation After Cardiac Death Liver Grafts in Pigs. *Transplant Proc*. Elsevier Inc.; 2016; 48: 1239–43. <https://doi.org/10.1016/j.transproceed.2015.12.076> PMID: 27320595
39. Matsuno N, Obara H, Watanabe R, Iwata S, Kono S, Fujiyama M, et al. Rewarming preservation by organ perfusion system for donation after cardiac death liver grafts in pigs. *Transplant Proc*. Elsevier Inc.; 2014; 46: 1095–8. <https://doi.org/10.1016/j.transproceed.2013.12.035> PMID: 24815137
40. Shigeta T, Matsuno N, Obara H, Kanazawa H, Tanaka H, Fukuda A, et al. Impact of rewarming preservation by continuous machine perfusion: improved post-transplant recovery in pigs. *Transplant Proc*. Elsevier Inc.; 2013; 45: 1684–9. <https://doi.org/10.1016/j.transproceed.2013.01.098> PMID: 23769024
41. Obara H, Matsuno N, Shigeta T, Hirano T, Enosawa S, Mizunuma H. Temperature controlled machine perfusion system for liver. *Transplant Proc*. Elsevier Inc.; 2013; 45: 1690–2. <https://doi.org/10.1016/j.transproceed.2013.01.087> PMID: 23769025
42. Bessems M, Doorschodt BM, van Marle J, Vreeling H, Meijer AJ, van Gulik TM. Improved machine perfusion preservation of the non-heart-beating donor rat liver using Polysol: a new machine perfusion preservation solution. *Liver Transpl*. 2005; 11: 1379–88. <https://doi.org/10.1002/lt.20502> PMID: 16237689
43. Fontes P, Lopez R, van der Plaats a, Vodovotz Y, Minervini M, Scott V, et al. Liver Preservation With Machine Perfusion and a Newly Developed Cell-Free Oxygen Carrier Solution Under Subnormothermic Conditions. *Am J Transplant*. 2015; 381–394. <https://doi.org/10.1111/ajt.12991> PMID: 25612645
44. Ye H, Wang D-P, Zhang C-Z, Zhang L-J, Wang H-C, Li Z-H, et al. Pathological characteristics of liver allografts from donation after brain death followed by cardiac death in pigs. *J Huazhong Univ Sci Technol Med Sci*. 2014; 34: 687–91. <https://doi.org/10.1007/s11596-014-1337-6> PMID: 25318878
45. Moussa ME, Sarraf CE, Uemoto S, Sawada H, Habib NA. Effect of total hepatic vascular exclusion during liver resection on hepatic ultrastructure. *Liver Transpl Surg*. 1996; 2: 461–467. PMID: 9346693
46. Watanabe I, Seguchi H, Okada T, Kobayashi T, Jin QS, Jiang XD. Fine structure of the acinar and duct cell components in the parotid and submandibular salivary glands of the rat: a TEM, SEM, and HRSEM study. *Histol Histopathol*. 1996; 11: 103–110. PMID: 8720453
47. Isola R, Solinas P, Loy F, Mariotti S, Riva A. 3-D structure of mitochondrial cristae in rat adrenal cortex varies after acute stimulation with ACTH and CRH. *Mitochondria*. Mitochondria Research Society; 2010; 10: 472–8. <https://doi.org/10.1016/j.mito.2010.05.007> PMID: 20546949
48. Tanaka K, Mitsushima A. A preparation method for observing intracellular structures by scanning electron microscopy. *J Microsc*. 1984; 133: 213–22. PMID: 6368836
49. Meng L, Matsuno N, Watanabe K, Furukori M, Obara H, Bochimoto H, et al. Scanning Electron Microscopy Findings of Machine Perfused Liver Graft After Warm Ischemia Between Hypothermic and Rewarming Machine Perfusion in Pigs. *Transplant Proc*. The Authors; 2016; 48: 2467–2470. <https://doi.org/10.1016/j.transproceed.2016.03.059> PMID: 27742324

50. Namimatsu S, Ghazizadeh M, Sugisaki Y. Reversing the effects of formalin fixation with citraconic anhydride and heat: a universal antigen retrieval method. *J Histochem Cytochem*. 2005; 53: 3–11. <https://doi.org/10.1177/002215540505300102> PMID: 15637333
51. Sisková Z, Mahad DJ, Pudney C, Campbell G, Cadogan M, Asuni A, et al. Morphological and functional abnormalities in mitochondria associated with synaptic degeneration in prion disease. *Am J Pathol*. 2010; 177: 1411–21. <https://doi.org/10.2353/ajpath.2010.091037> PMID: 20651247
52. Trimmer PA, Swerdlow RH, Parks JK, Keeney P, Bennett JP Jr., Miller SW, et al. Abnormal mitochondrial morphology in sporadic Parkinson's and Alzheimer's disease cybrid cell lines. *Exp Neurol*. 2000; 162: 37–50. <https://doi.org/10.1006/exnr.2000.7333> PMID: 10716887
53. Evankovich J, Zhang R, Cardinal JS, Zhang L, Chen J, Huang H, et al. Calcium/calmodulin-dependent protein kinase IV limits organ damage in hepatic ischemia-reperfusion injury through induction of autophagy. *AJP Gastrointest Liver Physiol*. 2012; 303: G189–G198. <https://doi.org/10.1152/ajpgi.00051.2012> PMID: 22575222
54. Tracy K, Dibling BC, Spike BT, Knabb JR, Schumacker P, Macleod KF. BNIP3 is an RB/E2F target gene required for hypoxia-induced autophagy. *Mol Cell Biol*. 2007; 27: 6229–42. <https://doi.org/10.1128/MCB.02246-06> PMID: 17576813
55. Zhang H, Bosch-Marce M, Shimoda LA, Tan YS, Baek JH, Wesley JB, et al. Mitochondrial Autophagy Is an HIF-1-dependent Adaptive Metabolic Response to Hypoxia. *J Biol Chem*. 2008; 283: 10892–10903. <https://doi.org/10.1074/jbc.M800102200> PMID: 18281291
56. Namas R a, Metukuri MR, Dhupar R, Velosa C, Jefferson BS, Myer E, et al. Hypoxia-induced overexpression of BNIP3 is not dependent on hypoxia-inducible factor 1 $\alpha$  in mouse hepatocytes. *Shock*. 2011; 36: 196–202. <https://doi.org/10.1097/SHK.0b013e3182205e07> PMID: 21558981
57. Hamasaki M, Furuta N, Matsuda A, Nezu A, Yamamoto A, Fujita N, et al. Autophagosomes form at ER-mitochondria contact sites. *Nature*. Nature Publishing Group; 2013; 495: 389–93. <https://doi.org/10.1038/nature11910> PMID: 23455425
58. Ashrafi G, Schwarz TL. The pathways of mitophagy for quality control and clearance of mitochondria. *Cell Death Differ*. Nature Publishing Group; 2013; 20: 31–42. <https://doi.org/10.1038/cdd.2012.81> PMID: 22743996
59. Czaja MJ, Ding W-X, Donohue TM, Friedman SL, Kim J, Komatsu M, et al. Functions of autophagy in normal and diseased liver. *Autophagy*. 2013; 9: 1131–58. <https://doi.org/10.4161/auto.25063> PMID: 23774882
60. Lemasters JJ. Variants of mitochondrial autophagy: Types 1 and 2 mitophagy and micromitophagy (Type 3). *Redox Biol*. Elsevier; 2014; 2: 749–54. <https://doi.org/10.1016/j.redox.2014.06.004> PMID: 25009776
61. Minor T, Stegemann J, Hirner A, Koetting M. Impaired autophagic clearance after cold preservation of fatty livers correlates with tissue necrosis upon reperfusion and is reversed by hypothermic reconditioning. *Liver Transpl*. 2009; 15: 798–805. <https://doi.org/10.1002/lt.21751> PMID: 19562717
62. Minor T, Koetting M, Koetting M, Kaiser G, Efferz P, Lürer B, et al. Hypothermic reconditioning by gaseous oxygen improves survival after liver transplantation in the pig. *Am J Transplant*. 2011; 11: 2627–34. <https://doi.org/10.1111/j.1600-6143.2011.03731.x> PMID: 21906256
63. Lee J, Giordano S, Zhang J. Autophagy, mitochondria and oxidative stress: cross-talk and redox signaling. *Biochem J*. 2012; 441: 523–540. <https://doi.org/10.1042/BJ20111451> PMID: 22187934
64. Bhogal RH, Weston CJ, Curbishley SM, Adams DH, Afford SC. Autophagy: a cyto-protective mechanism which prevents primary human hepatocyte apoptosis during oxidative stress. *Autophagy*. 2012; 8: 545–58. <https://doi.org/10.4161/auto.19012> PMID: 22302008
65. Kim JS, Nitta T, Mohuczy D, O'Malley K a., Moldawer LL, Dunn W a., et al. Impaired autophagy: A mechanism of mitochondrial dysfunction in anoxic rat hepatocytes. *Hepatology*. 2008; 47: 1725–1736. <https://doi.org/10.1002/hep.22187> PMID: 18311843
66. Srinivasan PK, Yagi S, Doorschodt B, Nagai K, Afify M, Uemoto S, et al. Impact of venous systemic oxygen persufflation supplemented with nitric oxide gas on cold-stored, warm ischemia-damaged experimental liver grafts. *Liver Transpl*. 2012; 18: 219–25. <https://doi.org/10.1002/lt.22442> PMID: 21987402
67. Monbaliu D, Crabbé T, Roskams T, Fevery J, Verwaest C, Pirenne J. Livers from non-heart-beating donors tolerate short periods of warm ischemia. *Transplantation*. 2005; 79: 1226–30. <https://doi.org/10.1097/01.TP.0000153508.71684.99> PMID: 15880075
68. Trowell OA. The experimental production of watery vacuolation of the liver. *J Physiol*. 1946; 105: 268–97.
69. Jurado F, Buján J, Mora NP, Jiménez M, Arahuetes R, Bellón JM. A histopathological study of anoxic-resuscitated liver allografts. *Histol Histopathol*. 1997; 12: 123–133.

70. Li X, Elwell MR, Ryan AM, Ochoa R. Morphogenesis of postmortem hepatocyte vacuolation and liver weight increases in Sprague-Dawley rats. *Toxicol Pathol.* 2003; 31: 682–8. <https://doi.org/10.1080/01926230390241981> PMID: 14585737
71. Monbaliu D, Libbrecht L, De Vos R, Vekemans K, Walter H, Liu Q, et al. The extent of vacuolation in non-heart-beating porcine donor liver grafts prior to transplantation predicts their viability. *Liver Transpl.* 2008; 14: 1256–65. <https://doi.org/10.1002/lt.21513> PMID: 18756467
72. Amir M, Zhao E, Fontana L, Rosenberg H, Tanaka K, Gao G, et al. Inhibition of hepatocyte autophagy increases tumor necrosis factor-dependent liver injury by promoting caspase-8 activation. *Cell Death Differ.* Nature Publishing Group; 2013; 20: 878–87. <https://doi.org/10.1038/cdd.2013.21> PMID: 23519075
73. Ding W-X. Induction of autophagy, a promising approach for treating liver injury. *Hepatology.* 2014; 59: 340–3. <https://doi.org/10.1002/hep.26572> PMID: 23775596
74. Du C, Fang M, Li Y, Li L, Wang X. Smac, a mitochondrial protein that promotes cytochrome c-dependent caspase activation by eliminating IAP inhibition. *Cell.* 2000; 102: 33–42. [https://doi.org/10.1016/S0092-8674\(00\)00008-8](https://doi.org/10.1016/S0092-8674(00)00008-8) PMID: 10929711
75. Olschewski P, Gass P, Ariyakhagorn V, Jasse K, Hunold G, Menzel M, et al. The influence of storage temperature during machine perfusion on preservation quality of marginal donor livers. *Cryobiology.* Elsevier Inc.; 2010; 60: 337–43. <https://doi.org/10.1016/j.cryobiol.2010.03.005> PMID: 20233587
76. Vairetti M, Ferrigno A, Carlucci F, Tabucchi A, Rizzo V, Boncompagni E, et al. Subnormothermic machine perfusion protects steatotic livers against preservation injury: a potential for donor pool increase? *Liver Transpl.* 2009; 15: 20–9. <https://doi.org/10.1002/lt.21581> PMID: 19109848
77. Minor T, Efferz P, Fox M, Wohlschlaeger J, Lüer B. Controlled oxygenated rewarming of cold stored liver grafts by thermally graduated machine perfusion prior to reperfusion. *Am J Transplant.* 2013; 13: 1450–60. <https://doi.org/10.1111/ajt.12235> PMID: 23617781
78. Salas M, Tuchweber B, Kourounakis P, Selye H. Temperature-dependence of stress-induced hepatic autophagy. *Experientia.* 1977; 33: 612–4. PMID: 862791
79. Salas M, Tuchweber B, Kourounakis P. Liver ultrastructure during acute stress. *Pathol Res Pract.* 1980; 167: 217–33. [https://doi.org/10.1016/S0344-0338\(80\)80052-5](https://doi.org/10.1016/S0344-0338(80)80052-5) PMID: 7433233
80. Koetting M, Lüer B, Efferz P, Paul A, Minor T. Optimal time for hypothermic reconditioning of liver grafts by venous systemic oxygen persufflation in a large animal model. *Transplantation.* 2011; 91: 42–7. <https://doi.org/10.1097/TP.0b013e3181fed021> PMID: 21441852
81. Minor T, Manekeller S, Sioutis M, Dombrowski F. Endoplasmic and vascular surface activation during organ preservation: Refining upon the benefits of machine perfusion. *Am J Transplant.* 2006; 6: 1355–1366. <https://doi.org/10.1111/j.1600-6143.2006.01338.x> PMID: 16686759
82. Marecki H, Bozorgzadeh A, Porte RJ, Leuvenink HG, Uygun K, Martins PN. Liver ex situ machine perfusion preservation: A review of the methodology and results of large animal studies and clinical trials. *Liver Transpl.* 2017; 23: 679–695. <https://doi.org/10.1002/lt.24751> PMID: 28240817
